# Supplementary material for: Deep Convolutional Neural Networks Exploit High-Spatial- and -Temporal-Resolution Aerial Imagery to Phenotype Key Traits in Miscanthus
Source: MDPI journal article supplement (doi:10.3390/rs14215333), 2022-10-25
Supplement: s1 [file s1]

**Table S1.** Description of image features, number of flights, number of image features and dimensions of image chips for the three imaging approaches tested.

| Model name | Image Features                          | Type of features       | N features | N flights | Image chip size <sup>4</sup> |
|------------|-----------------------------------------|------------------------|------------|-----------|------------------------------|
| RGB        | RGB <sup>1</sup>                        | Spectral               | 3          | 1-10      | 40 x 40 x 3-30               |
| MS         | RGB, Re <sup>2</sup> , NIR <sup>2</sup> | Spectral               | 5          | 1-10      | 40 x 40 x 5-50               |
| CSM_MS     | RGB, Re, NIR, CSM <sup>3</sup>          | Spectral and geometric | 6          | 1-10      | 40 x 40 x 6-60               |

<sup>1</sup>R=red, G = green, B=blue spectral bands.

<sup>2</sup>Re = red edge, NIR=near-infrared spectral bands.

<sup>3</sup>CSM = Crop surface model.

<sup>4</sup>Image chip size = N pixels (width) x N pixels (height) x Depth (N flights x N features).

**Table S2.** Description of the 138 CNN models implemented according to combinations of UAV-based image features, CNN architectures, and target traits.

| Model name        | Image features    | Trait          | Model architecture | Time length | Flights DOYs included |
|-------------------|-------------------|----------------|--------------------|-------------|-----------------------|
| RGB_TP_205 (1)    | RGB               | Flowering time | 2D-CNN             | 1           | 205                   |
| MS_TP_205 (1)     | RGB, Re, NIR      | Flowering time | 2D-CNN             | 1           | 205                   |
| CSM_MS_TP_205 (1) | RGB, Re, NIR, CSM | Flowering time | 2D-CNN             | 1           | 205                   |
| RGB_TP_221 (1)    | RGB               | Flowering time | 2D-CNN             | 1           | 221                   |
| MS_TP_221 (1)     | RGB, Re, NIR      | Flowering time | 2D-CNN             | 1           | 221                   |
| CSM_MS_TP_221 (1) | RGB, Re, NIR, CSM | Flowering time | 2D-CNN             | 1           | 221                   |
| RGB_TP_247 (1)    | RGB               | Flowering time | 2D-CNN             | 1           | 247                   |
| MS_TP_247 (1)     | RGB, Re, NIR      | Flowering time | 2D-CNN             | 1           | 247                   |
| CSM_MS_TP_247 (1) | RGB, Re, NIR, CSM | Flowering time | 2D-CNN             | 1           | 247                   |
| RGB_TP_262 (1)    | RGB               | Flowering time | 2D-CNN             | 1           | 262                   |
| MS_TP_262 (1)     | RGB, Re, NIR      | Flowering time | 2D-CNN             | 1           | 262                   |
| CSM_MS_TP_262 (1) | RGB, Re, NIR, CSM | Flowering time | 2D-CNN             | 1           | 262                   |
| RGB_TP_279 (1)    | RGB               | Flowering time | 2D-CNN             | 1           | 279                   |
| MS_TP_279 (1)     | RGB, Re, NIR      | Flowering time | 2D-CNN             | 1           | 279                   |
| CSM_MS_TP_279 (1) | RGB, Re, NIR, CSM | Flowering time | 2D-CNN             | 1           | 279                   |
| RGB_TP_310 (1)    | RGB               | Flowering time | 2D-CNN             | 1           | 310                   |
| MS_TP_310 (1)     | RGB, Re, NIR      | Flowering time | 2D-CNN             | 1           | 310                   |
| CSM_MS_TP_310 (1) | RGB, Re, NIR, CSM | Flowering time | 2D-CNN             | 1           | 310                   |
| RGB_TP_332 (1)    | RGB               | Flowering time | 2D-CNN             | 1           | 332                   |

|                       |                   |                  |        |   |                     |
|-----------------------|-------------------|------------------|--------|---|---------------------|
| MS_TP_332 (1)         | RGB, Re, NIR      | Flowering time   | 2D-CNN | 1 | 332                 |
| CSM_MS_TP_332 (1)     | RGB, Re, NIR, CSM | Flowering time   | 2D-CNN | 1 | 332                 |
| RGB_TR_262:279 (2)    | RGB               | Flowering time   | 3D-CNN | 2 | 262,279             |
| MS_TR_262:279 (2)     | RGB, Re, NIR      | Flowering time   | 3D-CNN | 2 | 262,279             |
| CSM_MS_TR_262:279 (2) | RGB, Re, NIR, CSM | Flowering time   | 3D-CNN | 2 | 262,279             |
| RGB_TR_247:279 (3)    | RGB               | Flowering time   | 3D-CNN | 3 | 247,262,279         |
| MS_TR_247:279 (3)     | RGB, Re, NIR      | Flowering time   | 3D-CNN | 3 | 247,262,279         |
| CSM_MS_TP_247:279 (3) | RGB, Re, NIR, CSM | Flowering time   | 3D-CNN | 3 | 247,262,279         |
| RGB_TR_221:279 (4)    | RGB               | Flowering time   | 3D-CNN | 4 | 221,247,262,279     |
| MS_TR_221:279 (4)     | RGB, Re, NIR      | Flowering time   | 3D-CNN | 4 | 221,247,262,279     |
| CSM_MS_TP_221:279 (4) | RGB, Re, NIR, CSM | Flowering time   | 3D-CNN | 4 | 221,247,262,279     |
| RGB_TR_247:310 (4)    | RGB               | Flowering time   | 3D-CNN | 4 | 247,262,279,310     |
| MS_TR_247:310 (4)     | RGB, Re, NIR      | Flowering time   | 3D-CNN | 4 | 247,262,279,310     |
| CSM_MS_TP_247:310 (4) | RGB, Re, NIR, CSM | Flowering time   | 3D-CNN | 4 | 247,262,279,310     |
| RGB_TR_221:310 (5)    | RGB               | Flowering time   | 3D-CNN | 5 | 221,247,262,279,310 |
| MS_TR_221:310 (5)     | RGB, Re, NIR      | Flowering time   | 3D-CNN | 5 | 221,247,262,279,310 |
| CSM_MS_TP_221:310 (5) | RGB, Re, NIR, CSM | Flowering time   | 3D-CNN | 5 | 221,247,262,279,310 |
| RGB_TP_157 (1)        | RGB               | Culm stem length | 2D-CNN | 1 | 157                 |
| MS_TP_157 (1)         | RGB, Re, NIR      | Culm stem length | 2D-CNN | 1 | 157                 |
| CSM_MS_TP_157 (1)     | RGB, Re, NIR, CSM | Culm stem length | 2D-CNN | 1 | 157                 |
| RGB_TP_174 (1)        | RGB               | Culm stem length | 2D-CNN | 1 | 174                 |
| MS_TP_174 (1)         | RGB, Re, NIR      | Culm stem length | 2D-CNN | 1 | 174                 |
| CSM_MS_TP_174 (1)     | RGB, Re, NIR, CSM | Culm stem length | 2D-CNN | 1 | 174                 |
| RGB_TP_190 (1)        | RGB               | Culm stem length | 2D-CNN | 1 | 190                 |
| MS_TP_190 (1)         | RGB, Re, NIR      | Culm stem length | 2D-CNN | 1 | 190                 |
| CSM_MS_TP_190 (1)     | RGB, Re, NIR, CSM | Culm stem length | 2D-CNN | 1 | 190                 |
| RGB_TP_205 (1)        | RGB               | Culm stem length | 2D-CNN | 1 | 205                 |
| MS_TP_205 (1)         | RGB, Re, NIR      | Culm stem length | 2D-CNN | 1 | 205                 |
| CSM_MS_TP_205 (1)     | RGB, Re, NIR, CSM | Culm stem length | 2D-CNN | 1 | 205                 |
| RGB_TP_221 (1)        | RGB               | Culm stem length | 2D-CNN | 1 | 221                 |
| MS_TP_221 (1)         | RGB, Re, NIR      | Culm stem length | 2D-CNN | 1 | 221                 |
| CSM_MS_TP_221 (1)     | RGB, Re, NIR, CSM | Culm stem length | 2D-CNN | 1 | 221                 |
| RGB_TP_247 (1)        | RGB               | Culm stem length | 2D-CNN | 1 | 247                 |
| MS_TP_247 (1)         | RGB, Re, NIR      | Culm stem length | 2D-CNN | 1 | 247                 |
| CSM_MS_TP_247 (1)     | RGB, Re, NIR, CSM | Culm stem length | 2D-CNN | 1 | 247                 |
| RGB_TP_262 (1)        | RGB               | Culm stem length | 2D-CNN | 1 | 262                 |
| MS_TP_262 (1)         | RGB, Re, NIR      | Culm stem length | 2D-CNN | 1 | 262                 |
| CSM_MS_TP_262 (1)     | RGB, Re, NIR, CSM | Culm stem length | 2D-CNN | 1 | 262                 |

|                        |                   |                  |        |    |                                         |
|------------------------|-------------------|------------------|--------|----|-----------------------------------------|
| RGB_TP_279 (1)         | RGB               | Culm stem length | 2D-CNN | 1  | 279                                     |
| MS_TP_279 (1)          | RGB, Re, NIR      | Culm stem length | 2D-CNN | 1  | 279                                     |
| CSM_MS_TP_279 (1)      | RGB, Re, NIR, CSM | Culm stem length | 2D-CNN | 1  | 279                                     |
| RGB_TP_310 (1)         | RGB               | Culm stem length | 2D-CNN | 1  | 310                                     |
| MS_TP_310 (1)          | RGB, Re, NIR      | Culm stem length | 2D-CNN | 1  | 310                                     |
| CSM_MS_TP_310 (1)      | RGB, Re, NIR, CSM | Culm stem length | 2D-CNN | 1  | 310                                     |
| RGB_TP_332 (1)         | RGB               | Culm stem length | 2D-CNN | 1  | 332                                     |
| MS_TP_332 (1)          | RGB, Re, NIR      | Culm stem length | 2D-CNN | 1  | 332                                     |
| CSM_MS_TP_332 (1)      | RGB, Re, NIR, CSM | Culm stem length | 2D-CNN | 1  | 332                                     |
| RGB_TR_247_332 (2)     | RGB               | Culm stem length | 3D-CNN | 2  | 247,332                                 |
| MS_TR_247_332 (2)      | RGB, Re, NIR      | Culm stem length | 3D-CNN | 2  | 247,332                                 |
| CSM_MS_TR_247_332 (2)  | RGB, Re, NIR, CSM | Culm stem length | 3D-CNN | 2  | 247,332                                 |
| RGB_TR_174:332 (3)     | RGB               | Culm stem length | 3D-CNN | 3  | 174,247,332                             |
| MS_TR_174:332 (3)      | RGB, Re, NIR      | Culm stem length | 3D-CNN | 3  | 174,247,332                             |
| CSM_MS_TP_174:332 (3)  | RGB, Re, NIR, CSM | Culm stem length | 3D-CNN | 3  | 174,247,332                             |
| RGB_TR_157:190 (3)     | RGB               | Culm stem length | 3D-CNN | 3  | 157,174,190                             |
| MS_TR_157:190 (3)      | RGB, Re, NIR      | Culm stem length | 3D-CNN | 3  | 157,174,190                             |
| CSM_MS_TP_157:190 (3)  | RGB, Re, NIR, CSM | Culm stem length | 3D-CNN | 3  | 157,174,190                             |
| RGB_TR_205:247 (3)     | RGB               | Culm stem length | 3D-CNN | 3  | 205,221,247                             |
| MS_TR_205:247 (3)      | RGB, Re, NIR      | Culm stem length | 3D-CNN | 3  | 205,221,247                             |
| CSM_MS_TP_205:247 (3)  | RGB, Re, NIR, CSM | Culm stem length | 3D-CNN | 3  | 205,221,247                             |
| RGB_TR_279:332 (3)     | RGB               | Culm stem length | 3D-CNN | 3  | 279,310,332                             |
| MS_TR_279:332 (3)      | RGB, Re, NIR      | Culm stem length | 3D-CNN | 3  | 279,310,332                             |
| CSM_MS_TP_279:332 (3)  | RGB, Re, NIR, CSM | Culm stem length | 3D-CNN | 3  | 279,310,332                             |
| RGB_TR_247:332 (5)     | RGB               | Culm stem length | 3D-CNN | 5  | 247,262,279,310,332                     |
| MS_TR_247:332 (5)      | RGB, Re, NIR      | Culm stem length | 3D-CNN | 5  | 247,262,279,310,332                     |
| CSM_MS_TP_247:332 (5)  | RGB, Re, NIR, CSM | Culm stem length | 3D-CNN | 5  | 247,262,279,310,332                     |
| RGB_TR_157:332 (10)    | RGB               | Culm stem length | 3D-CNN | 10 | 157,174,190,205,221,247,262,279,310,332 |
| MS_TR_157:332 (10)     | RGB, Re, NIR      | Culm stem length | 3D-CNN | 10 | 157,174,190,205,221,247,262,279,310,332 |
| CSM_MS_TP_157:332 (10) | RGB, Re, NIR, CSM | Culm stem length | 3D-CNN | 10 | 157,174,190,205,221,247,262,279,310,332 |
| RGB_TP_157 (1)         | RGB               | Biomass yield    | 2D-CNN | 1  | 157                                     |
| MS_TP_157 (1)          | RGB, Re, NIR      | Biomass yield    | 2D-CNN | 1  | 157                                     |
| CSM_MS_TP_157 (1)      | RGB, Re, NIR, CSM | Biomass yield    | 2D-CNN | 1  | 157                                     |
| RGB_TP_174 (1)         | RGB               | Biomass yield    | 2D-CNN | 1  | 174                                     |
| MS_TP_174 (1)          | RGB, Re, NIR      | Biomass yield    | 2D-CNN | 1  | 174                                     |
| CSM_MS_TP_174 (1)      | RGB, Re, NIR, CSM | Biomass yield    | 2D-CNN | 1  | 174                                     |
| RGB_TP_190 (1)         | RGB               | Biomass yield    | 2D-CNN | 1  | 190                                     |
| MS_TP_190 (1)          | RGB, Re, NIR      | Biomass yield    | 2D-CNN | 1  | 190                                     |

|                       |                   |               |        |   |                     |
|-----------------------|-------------------|---------------|--------|---|---------------------|
| CSM_MS_TP_190 (1)     | RGB, Re, NIR, CSM | Biomass yield | 2D-CNN | 1 | 190                 |
| RGB_TP_205 (1)        | RGB               | Biomass yield | 2D-CNN | 1 | 205                 |
| MS_TP_205 (1)         | RGB, Re, NIR      | Biomass yield | 2D-CNN | 1 | 205                 |
| CSM_MS_TP_205 (1)     | RGB, Re, NIR, CSM | Biomass yield | 2D-CNN | 1 | 205                 |
| RGB_TP_221 (1)        | RGB               | Biomass yield | 2D-CNN | 1 | 221                 |
| MS_TP_221 (1)         | RGB, Re, NIR      | Biomass yield | 2D-CNN | 1 | 221                 |
| CSM_MS_TP_221 (1)     | RGB, Re, NIR, CSM | Biomass yield | 2D-CNN | 1 | 221                 |
| RGB_TP_247 (1)        | RGB               | Biomass yield | 2D-CNN | 1 | 247                 |
| MS_TP_247 (1)         | RGB, Re, NIR      | Biomass yield | 2D-CNN | 1 | 247                 |
| CSM_MS_TP_247 (1)     | RGB, Re, NIR, CSM | Biomass yield | 2D-CNN | 1 | 247                 |
| RGB_TP_262 (1)        | RGB               | Biomass yield | 2D-CNN | 1 | 262                 |
| MS_TP_262 (1)         | RGB, Re, NIR      | Biomass yield | 2D-CNN | 1 | 262                 |
| CSM_MS_TP_262 (1)     | RGB, Re, NIR, CSM | Biomass yield | 2D-CNN | 1 | 262                 |
| RGB_TP_279 (1)        | RGB               | Biomass yield | 2D-CNN | 1 | 279                 |
| MS_TP_279 (1)         | RGB, Re, NIR      | Biomass yield | 2D-CNN | 1 | 279                 |
| CSM_MS_TP_279 (1)     | RGB, Re, NIR, CSM | Biomass yield | 2D-CNN | 1 | 279                 |
| RGB_TP_310 (1)        | RGB               | Biomass yield | 2D-CNN | 1 | 310                 |
| MS_TP_310 (1)         | RGB, Re, NIR      | Biomass yield | 2D-CNN | 1 | 310                 |
| CSM_MS_TP_310 (1)     | RGB, Re, NIR, CSM | Biomass yield | 2D-CNN | 1 | 310                 |
| RGB_TP_332 (1)        | RGB               | Biomass yield | 2D-CNN | 1 | 332                 |
| MS_TP_332 (1)         | RGB, Re, NIR      | Biomass yield | 2D-CNN | 1 | 332                 |
| CSM_MS_TP_332 (1)     | RGB, Re, NIR, CSM | Biomass yield | 2D-CNN | 1 | 332                 |
| RGB_TR_247_332 (2)    | RGB               | Biomass yield | 3D-CNN | 2 | 247,332             |
| MS_TR_247_332 (2)     | RGB, Re, NIR      | Biomass yield | 3D-CNN | 2 | 247,332             |
| CSM_MS_TR_247_332 (2) | RGB, Re, NIR, CSM | Biomass yield | 3D-CNN | 2 | 247,332             |
| RGB_TR_174:332 (3)    | RGB               | Biomass yield | 3D-CNN | 3 | 174,247,332         |
| MS_TR_174:332 (3)     | RGB, Re, NIR      | Biomass yield | 3D-CNN | 3 | 174,247,332         |
| CSM_MS_TP_174:332 (3) | RGB, Re, NIR, CSM | Biomass yield | 3D-CNN | 3 | 174,247,332         |
| RGB_TR_157:190 (3)    | RGB               | Biomass yield | 3D-CNN | 3 | 157,174,190         |
| MS_TR_157:190 (3)     | RGB, Re, NIR      | Biomass yield | 3D-CNN | 3 | 157,174,190         |
| CSM_MS_TP_157:190 (3) | RGB, Re, NIR, CSM | Biomass yield | 3D-CNN | 3 | 157,174,190         |
| RGB_TR_205:247 (3)    | RGB               | Biomass yield | 3D-CNN | 3 | 205,221,247         |
| MS_TR_205:247 (3)     | RGB, Re, NIR      | Biomass yield | 3D-CNN | 3 | 205,221,247         |
| CSM_MS_TP_205:247 (3) | RGB, Re, NIR, CSM | Biomass yield | 3D-CNN | 3 | 205,221,247         |
| RGB_TR_279:332 (3)    | RGB               | Biomass yield | 3D-CNN | 3 | 279,310,332         |
| MS_TR_279:332 (3)     | RGB, Re, NIR      | Biomass yield | 3D-CNN | 3 | 279,310,332         |
| CSM_MS_TP_279:332 (3) | RGB, Re, NIR, CSM | Biomass yield | 3D-CNN | 3 | 279,310,332         |
| RGB_TR_247:332 (5)    | RGB               | Biomass yield | 3D-CNN | 5 | 247,262,279,310,332 |

|                        |                   |               |        |    |                                         |
|------------------------|-------------------|---------------|--------|----|-----------------------------------------|
| MS_TR_247:332 (5)      | RGB, Re, NIR      | Biomass yield | 3D-CNN | 5  | 247,262,279,310,332                     |
| CSM_MS_TP_247:332 (5)  | RGB, Re, NIR, CSM | Biomass yield | 3D-CNN | 5  | 247,262,279,310,332                     |
| RGB_TR_157:332 (10)    | RGB               | Biomass yield | 3D-CNN | 10 | 157,174,190,205,221,247,262,279,310,332 |
| MS_TR_157:332 (10)     | RGB, Re, NIR      | Biomass yield | 3D-CNN | 10 | 157,174,190,205,221,247,262,279,310,332 |
| CSM_MS_TP_157:332 (10) | RGB, Re, NIR, CSM | Biomass yield | 3D-CNN | 10 | 157,174,190,205,221,247,262,279,310,332 |

---
